# Supplementary material
Source: MDPI journal article supplement (https://www.mdpi.com/1999-4907/13/7/1150)
Supplement: s1 [file s1]

## Supplementary files

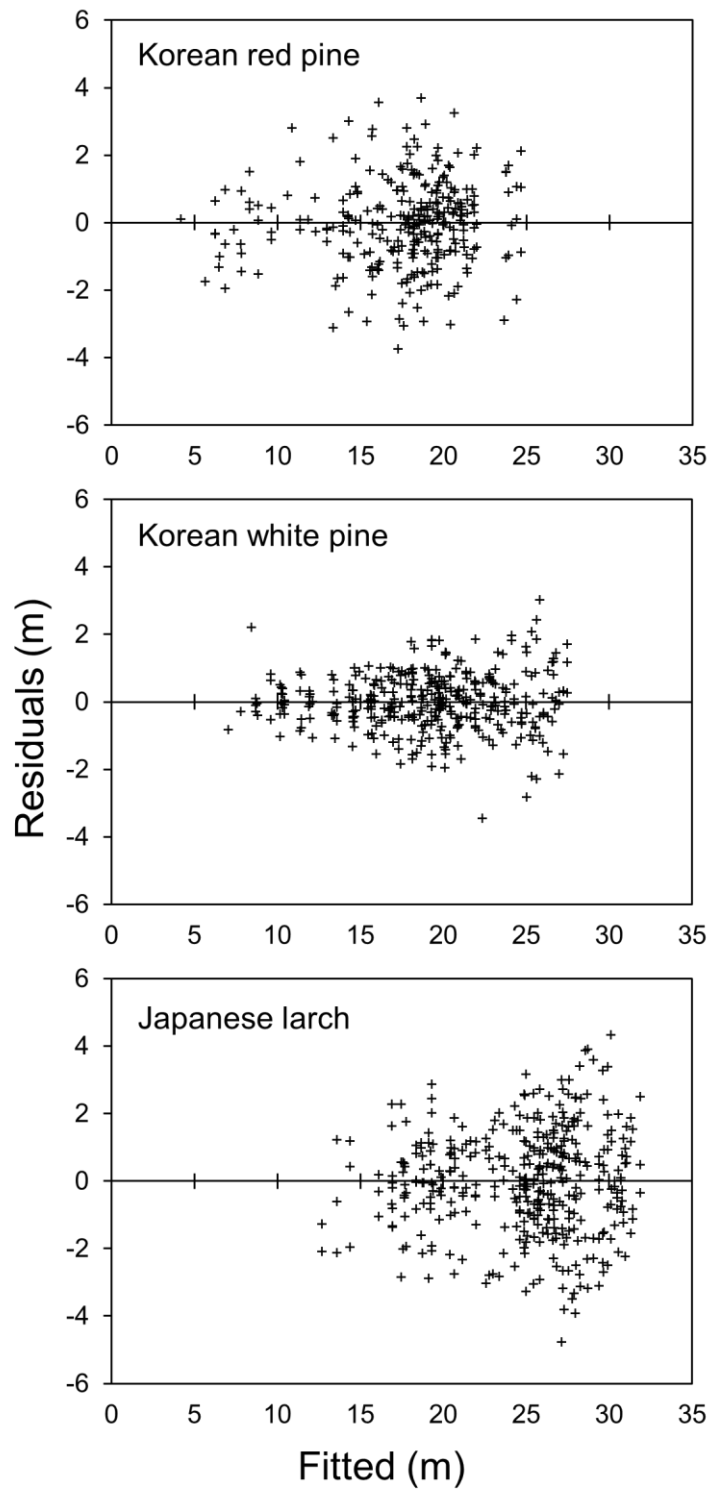

Figure S1. Residual plots of the dominant height model over the fitted values based on the Chapman–Richards function by species. The fitted values were derived from the mixed-effect parameters in Table 3 using Equation (10) of the main manuscript.

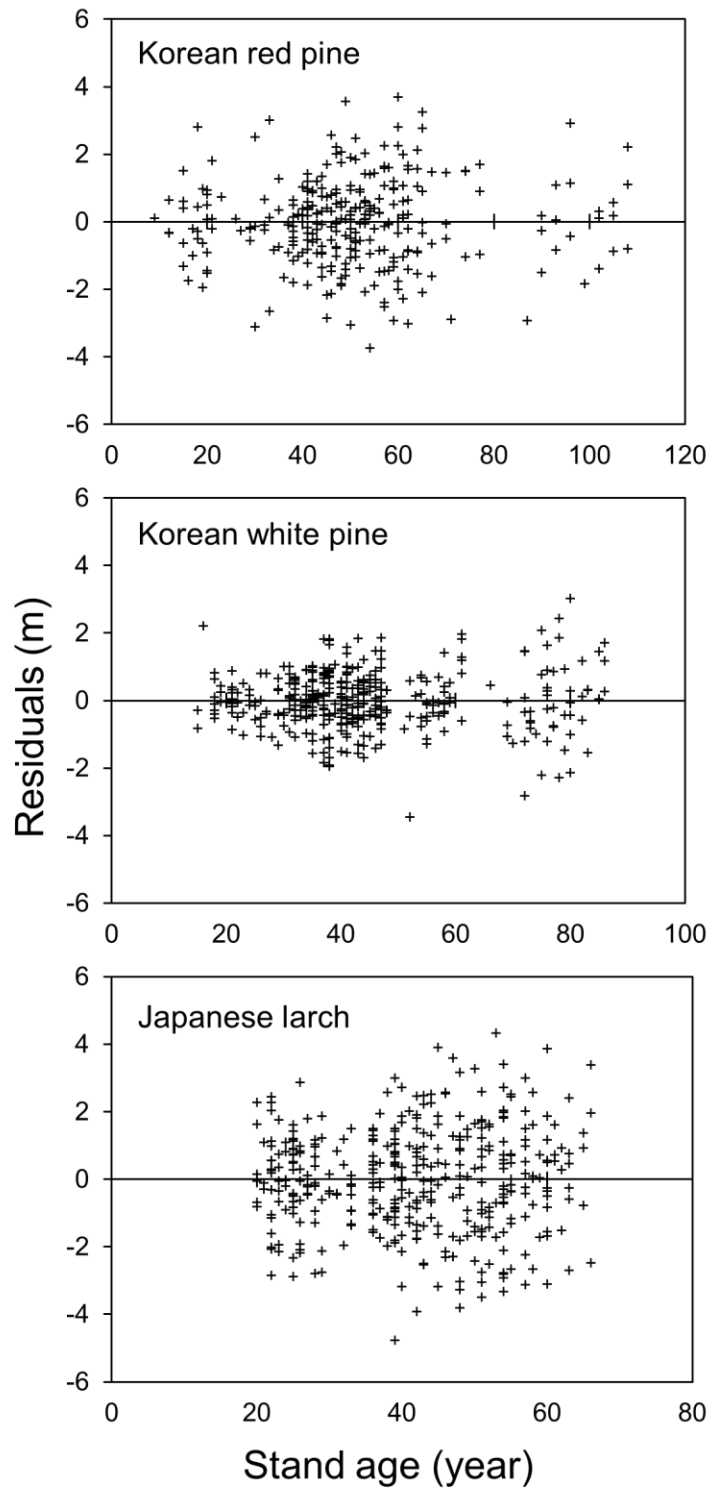

Figure S2. Residual plots of the dominant height model over the stand age based on the Chapman–Richards function by species. The fitted values were derived from the mixed-effect parameters in Table 3 using Equation (10) of the main manuscript.

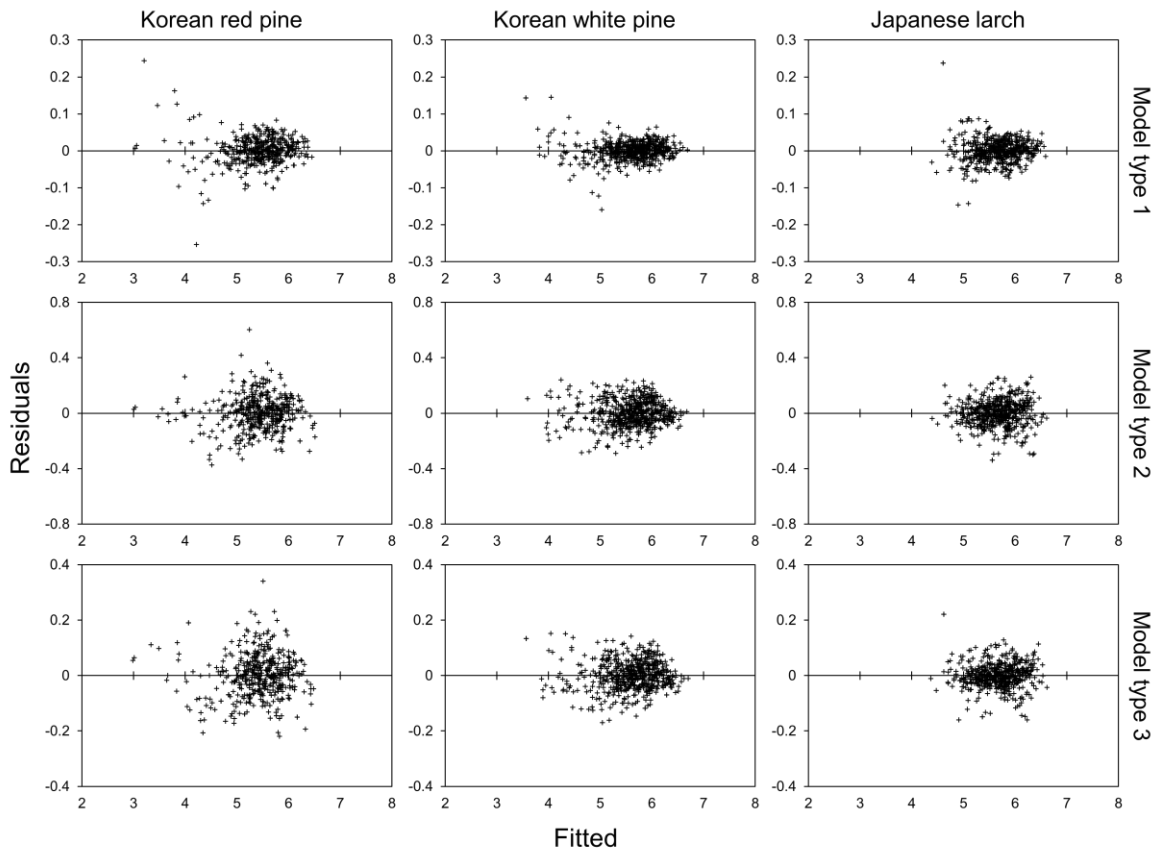

Figure S3. Residual plots of the variable-density yield models with the logarithmic scale over the fitted values by species and model type. The fitted values were derived from the mixed-effect parameters in Table 4 using Equation (11) of the main manuscript.

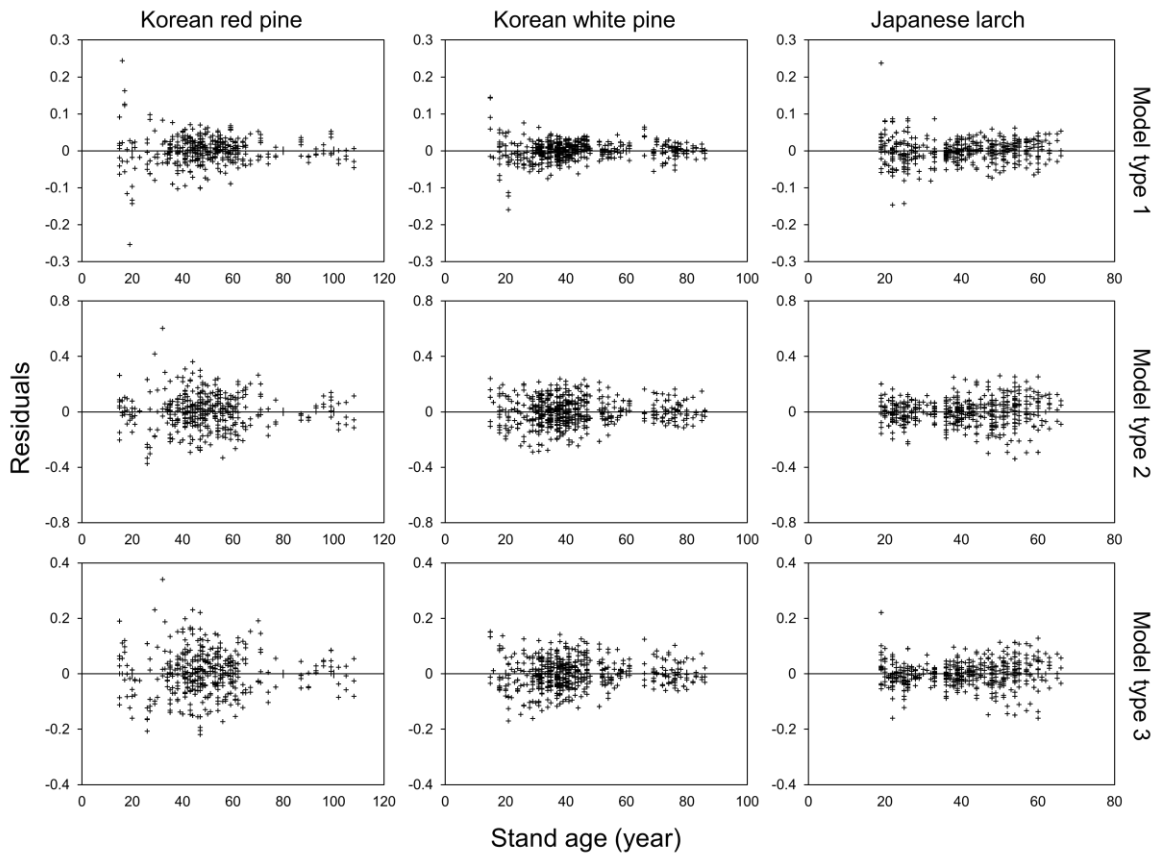

Figure S4. Residual plots of the variable-density yield models with the logarithmic scale over the stand age by species and model type. The fitted values were derived from the mixed-effect parameters in Table 4 using Equation (11) of the main manuscript.

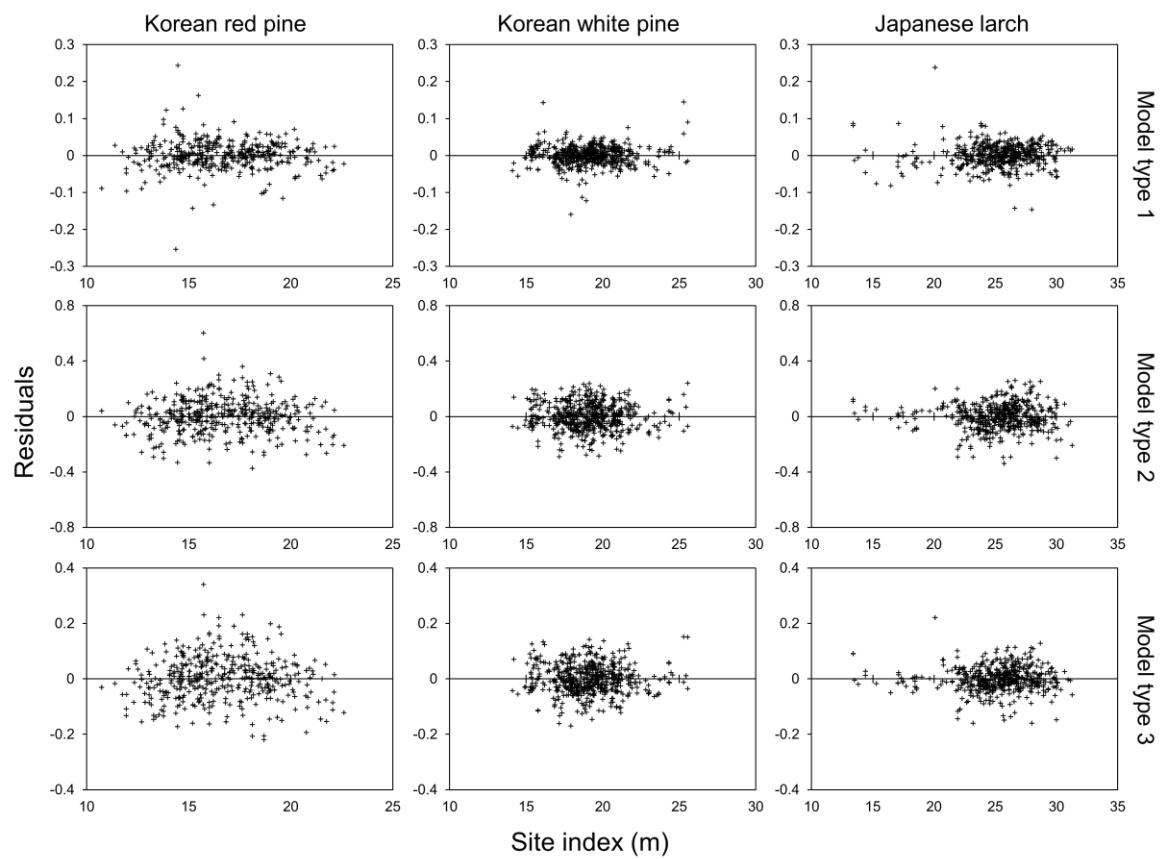

Figure S5. Residual plots of the variable-density yield models with a logarithmic scale over the site index by species and model type. The fitted values were derived from the mixed-effect parameters in Table 4 using Equation (11) of the main manuscript.

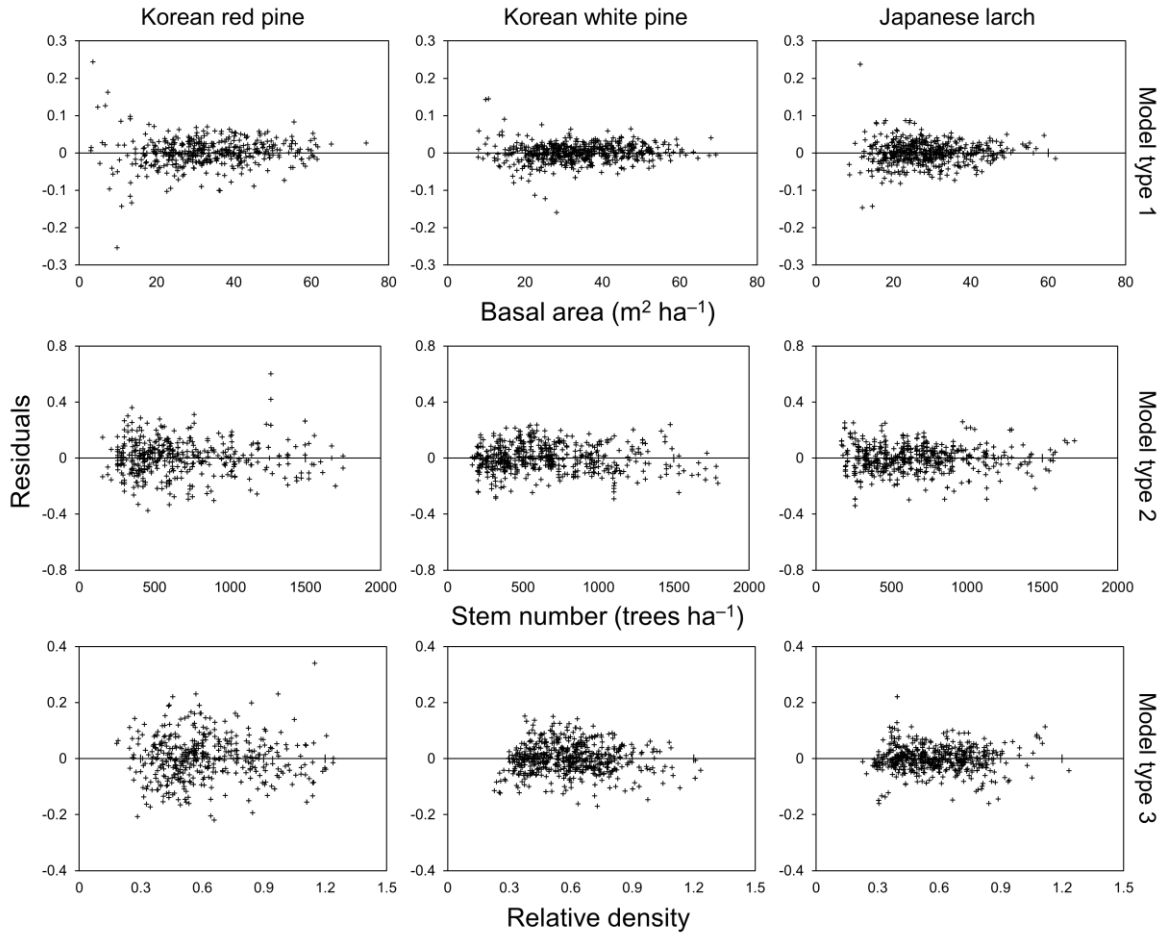

Figure S6. Residual plots of the variable-density yield models with a logarithmic scale over the basal area (type 1, first row), stem number (type 2, second row), and relative density (type 3, third row) by species. The fitted values were derived from the mixed-effect parameters in Table 4 using Equation (11) of the main manuscript.

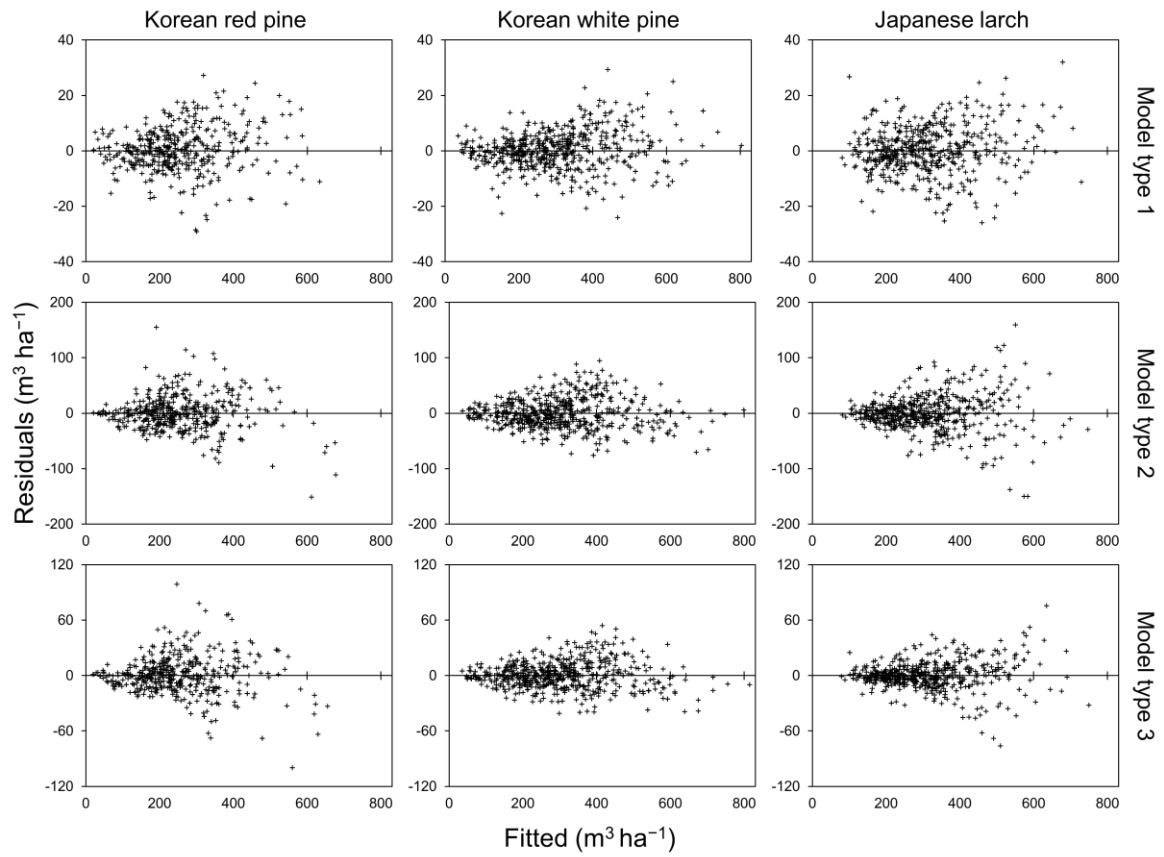

Figure S7. Residual plots of the variable-density yield models with an arithmetic scale over the fitted values by species and model type. The fitted values were derived from the mixed-effect parameters in Table 4 using Equation (11) of the main manuscript.

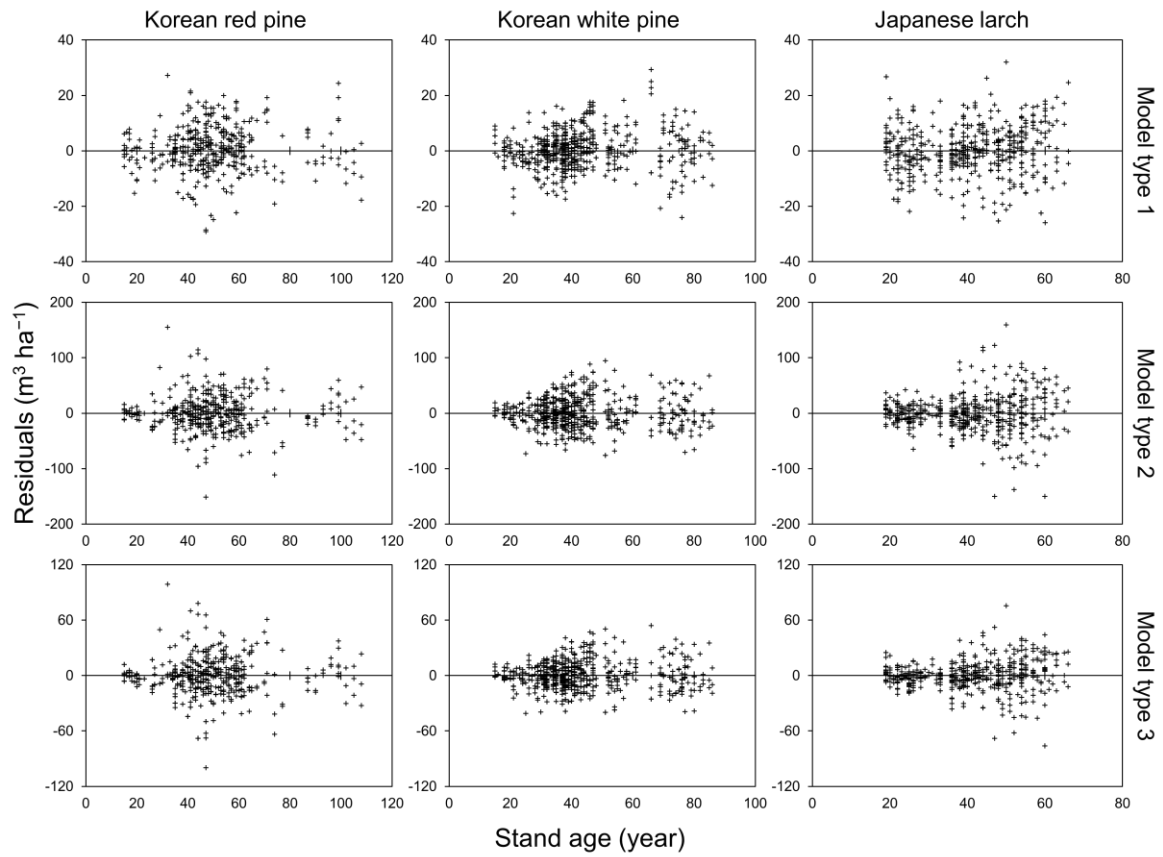

Figure S8. Residual plots of the variable-density yield models with an arithmetic scale over the stand age by species and model type. The fitted values were derived from the mixed-effect parameters in Table 4 using Equation (11) of the main manuscript.



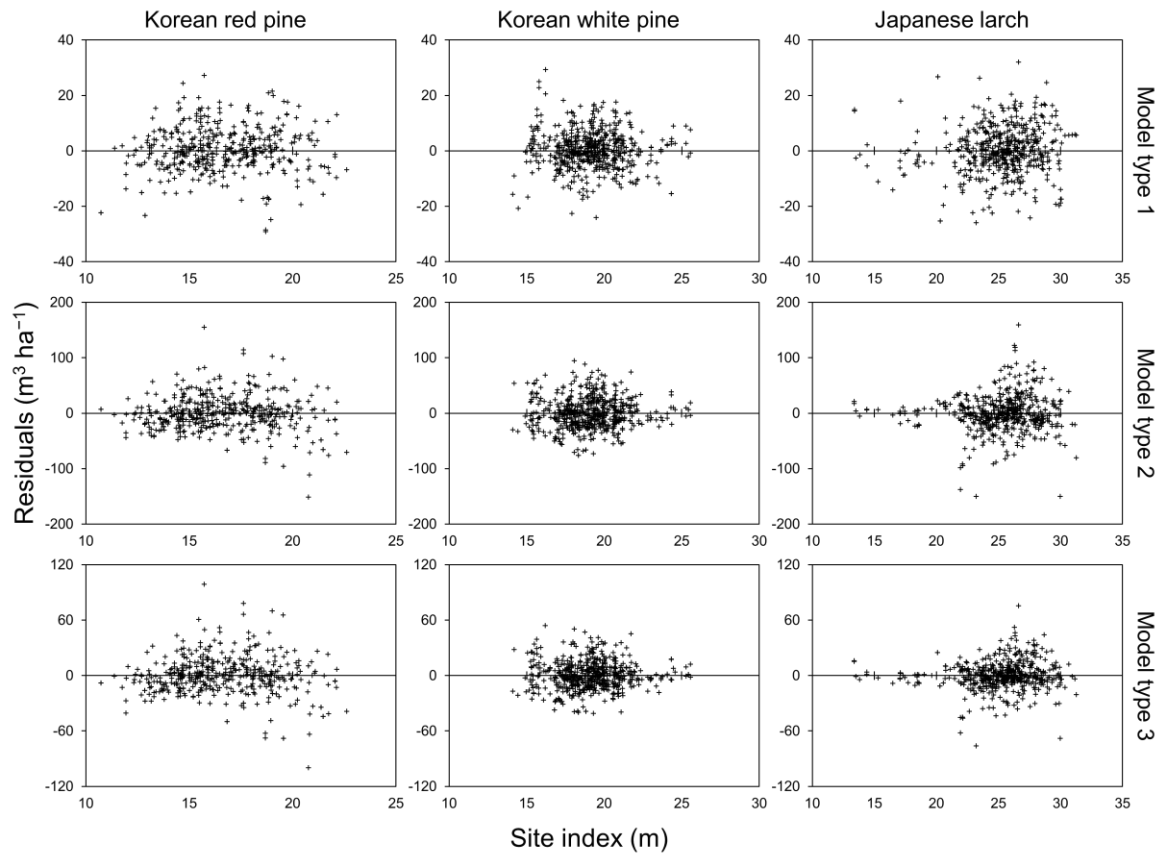

Figure S9. Residual plots of the variable-density yield models with an arithmetic scale over the basal area (type 1, first row), stem number (type 2, second row), and relative density (type 3, third row) by species. The fitted values were derived from the mixed-effect parameters in Table 4 using Equation (11) of the main manuscript.

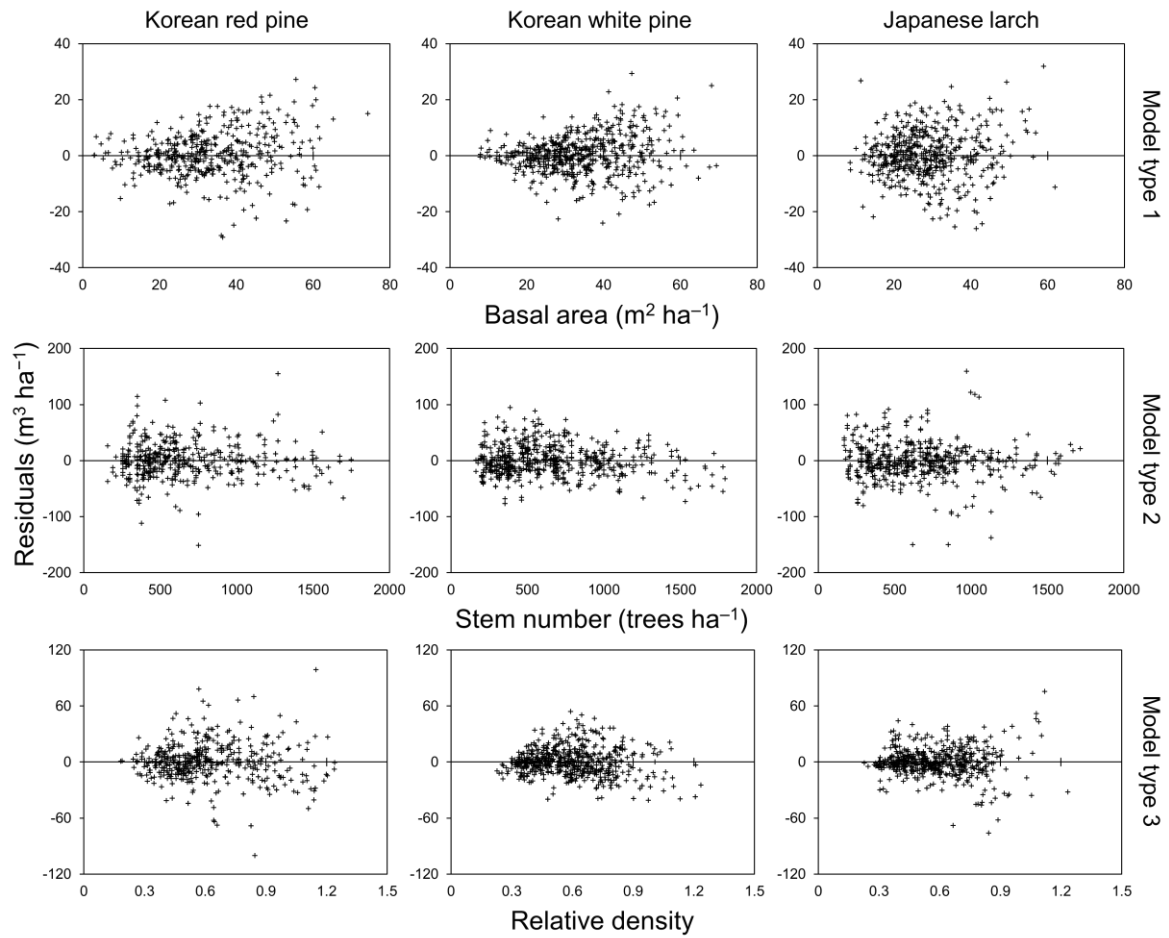

Figure S10. Residual plots of the variable-density yield models with an arithmetic scale over the basal area (type 1, first row), stem number (type 2, second row), and relative density (type 3, third row) by species. The fitted values were derived from the mixed-effect parameters in Table 4 using Equation (11) of the main manuscript.
